# Supplementary material for: A novel canine histiocytic sarcoma cell line: initial characterization and utilization for drug screening studies
Source: BMC Cancer. 2018 Mar 1;18:237. doi: 10.1186/s12885-018-4132-0 (PMC5831740; doi:10.1186/s12885-018-4132-0)
Supplement: Supplementary file 1 — Genetic profile of BD cell line genotyped using of a panel of microsatellite markers. (XLSX 31 kb) [file 12885_2018_4132_MOESM1_ESM.xlsx]

## Sheet: Additional file 1
	Additional file 1
	Genetic profile of a panel of microsatellite markers for genotyping of BD cell line
	Marker Analysis (CellCheck IDEXX BioResearch)
		Marker	Locus	Chromosome	BD cell line profile
		Canine 1	FH3210	2	285, 293
		Canine 17	PEZ12	3	301
		Canine 2	FH3241	8	260, 264
		Canine 3	FH2004	11	170, 174
		Canine 16	FH2054	12	156, 160
		Canine 4	FH2658	14	116
		Canine 5	FH4012	15	119, 127
		Canine 6	REN214L11	16	150
		Canine 13	WILMS-TF	18	279
		Canine 7	FH2010	24	155
		Canine 14	PEZ6	27	183, 188
		Canine 19	VWF.X	27	155
		Canine 8	FH2361	33	248
		Canine 15	FH2611	36	193, 197
		Sex	AR (X), Sry1.1 (Y)	X, Y	X, X
